# Supplementary material for: Diversification and Distribution of Ruminant Chlamydia abortus Clones Assessed by MLST and MLVA
Source: PubMed Central journal article supplement (PMC4441495; doi:10.1371/journal.pone.0126433), 2015-05-22
Supplement: pone.0126433.s006.pdf [file pone.0126433.s006.pdf]

**S1 Table. Variant alleles of the single-locus variants (SLVs) found within *C. abortus* clonal complex and comparison with LLG singleton clone (ST30).**

| ST of ancestor clone                   | ST of SLV | Variant locus in SLV       | Ancestral allele | SLV allele       | No of nucleotide differences | Other clones containing SLV allele       | Amino acid change <sup>a</sup> |
|----------------------------------------|-----------|----------------------------|------------------|------------------|------------------------------|------------------------------------------|--------------------------------|
| 19                                     | 86        | <i>hemN</i>                | 4                | 14               | 1                            | ST25                                     | Syn                            |
| 19                                     | 87        | <i>hemN</i>                | 4                | 21               | 1                            | None                                     | A-T <sup>b</sup>               |
| 19                                     | 29        | <i>fumC</i>                | 5                | 18               | 1                            | None                                     | Syn                            |
| 86                                     | 25        | <i>gatA</i>                | 5                | 18               | 1                            | None                                     | Syn                            |
| comparison with ST30 (singleton clone) |           | Variant locus in singleton | ST19 allele      | Singleton allele |                              | Other clones containing singleton allele |                                |
|                                        |           | <i>gatA</i>                | 5                | 13               | 1                            | ST36*                                    | G-D <sup>c</sup>               |
|                                        |           | <i>oppA</i>                | 8                | 18               | 1                            | None                                     | Syn                            |
|                                        |           | <i>gidA</i>                | 8                | 19               | 1                            | None                                     | Syn                            |
|                                        |           | <i>enoA</i>                | 8                | 16               | 2                            | None                                     | G-E <sup>d</sup>               |
|                                        |           | <i>fumC</i>                | 5                | 17               | 3 <sup>e</sup>               | None                                     | Syn                            |

<sup>a</sup> Residue in ST19 is given first. Syn, synonymous change

<sup>b</sup> Amino-acid Thr (T) at the position 115 is unique among all chlamydial *hemN*-encoded protein alleles (S2A.b Fig)

<sup>c</sup> Amino-acid Gly (G) characterizing *C. abortus* clonal complex is unique among all chlamydial *gatA*-encoded protein alleles at the conserved position 125 (S2B.b Fig)

<sup>d</sup> Amino-acid Glu (E) is unique among all chlamydial *enoA*-encoded protein alleles at the conserved position 106 (S2D.b Fig)

<sup>e</sup> Residue T at position 243 of *fumC*\_17 harbouring in the LLG singleton is unique among all chlamydial *fumC* alleles (S2C.b Fig)

\* ST36 corresponds to the variant *C. psittaci* 84/2334 strain previously proposed belonging to *C. abortus* [22]
