# Supplementary material for: Diversification and Distribution of Ruminant Chlamydia abortus Clones Assessed by MLST and MLVA
Source: PLoS One. 2015 May 22;10(5):e0126433. doi: 10.1371/journal.pone.0126433 (PMC4441495; doi:10.1371/journal.pone.0126433)
Supplement: S2 Fig — Consensus blocks are shaded light-gray; 20% has been taking as a minimal fraction of a specific nucleotide at a defined consensus position. Amino-acid substitutions among C. abortus MLST-encoded protein alleles (b) Conserved sites are shaded gray in the protein sequence alignments. A. Nucleotide substitutions among three C. abortus hemN alleles (in boldface; hemN_4, hemN_21, hemN_14 ruminant and avian C. abortus alleles) (a) The positions in which the C. abortus hemN alleles present substitutions (positions 261 & 343) are shaded by colours. The substitution (point mutation) that occurs within the clonal complex at the position 261 (alleles hemN_4 and hemN_14) is synonymous, whereas the substitution at the position 343 (alleles hemN_4 and hemN_21) is non-synonymous (see b). Residues G and A, at the positions 261 & 343, respectively, are unique among all chlamydial hemN alleles. Amino-acid substitutions among three C. abortus hemN-encoded protein alleles (b) The non-synonymous amino-acid Thr (T) harboured at the position 115 of hemN_21-encoded protein is unique among all chlamydiae; shaded by distinct colour. B. Nucleotide substitutions among three C. abortus gatA alleles (in boldface; gatA_5, gatA_18, gatA_13 ruminant and avian C. abortus alleles) (a) The positions in which the C. abortus gatA alleles present substitutions (positions 165 & 374) are shaded by colours. The substitution (point mutation) that occurs at the position 165 within the clonal complex (alleles gatA_5 and gatA_18) is synonymous (see b). Residue G at the position 374 characteristic for C. abortus clonal complex, is unique among all chlamydial gatA alleles. Amino-acid substitutions among three C. abortus gatA-encoded protein alleles (b) The amino-acid Gly (G) characterizing the C. abortus clonal complex is unique among all chlamydial gatA-encoded protein alleles at the conserved position 125; shaded by distinct colour. C. Nucleotide substitutions among four C. abortus fumC alleles (in boldface; fu [file pone.0126433.s002.pdf]

S2 Fig.

A. Nucleotide substitutions among three *C. abortus* *hemN* alleles (in boldface; *hemN*\_4, *hemN*\_21, *hemN*\_14 ruminant and avian *C. abortus* alleles) (a)

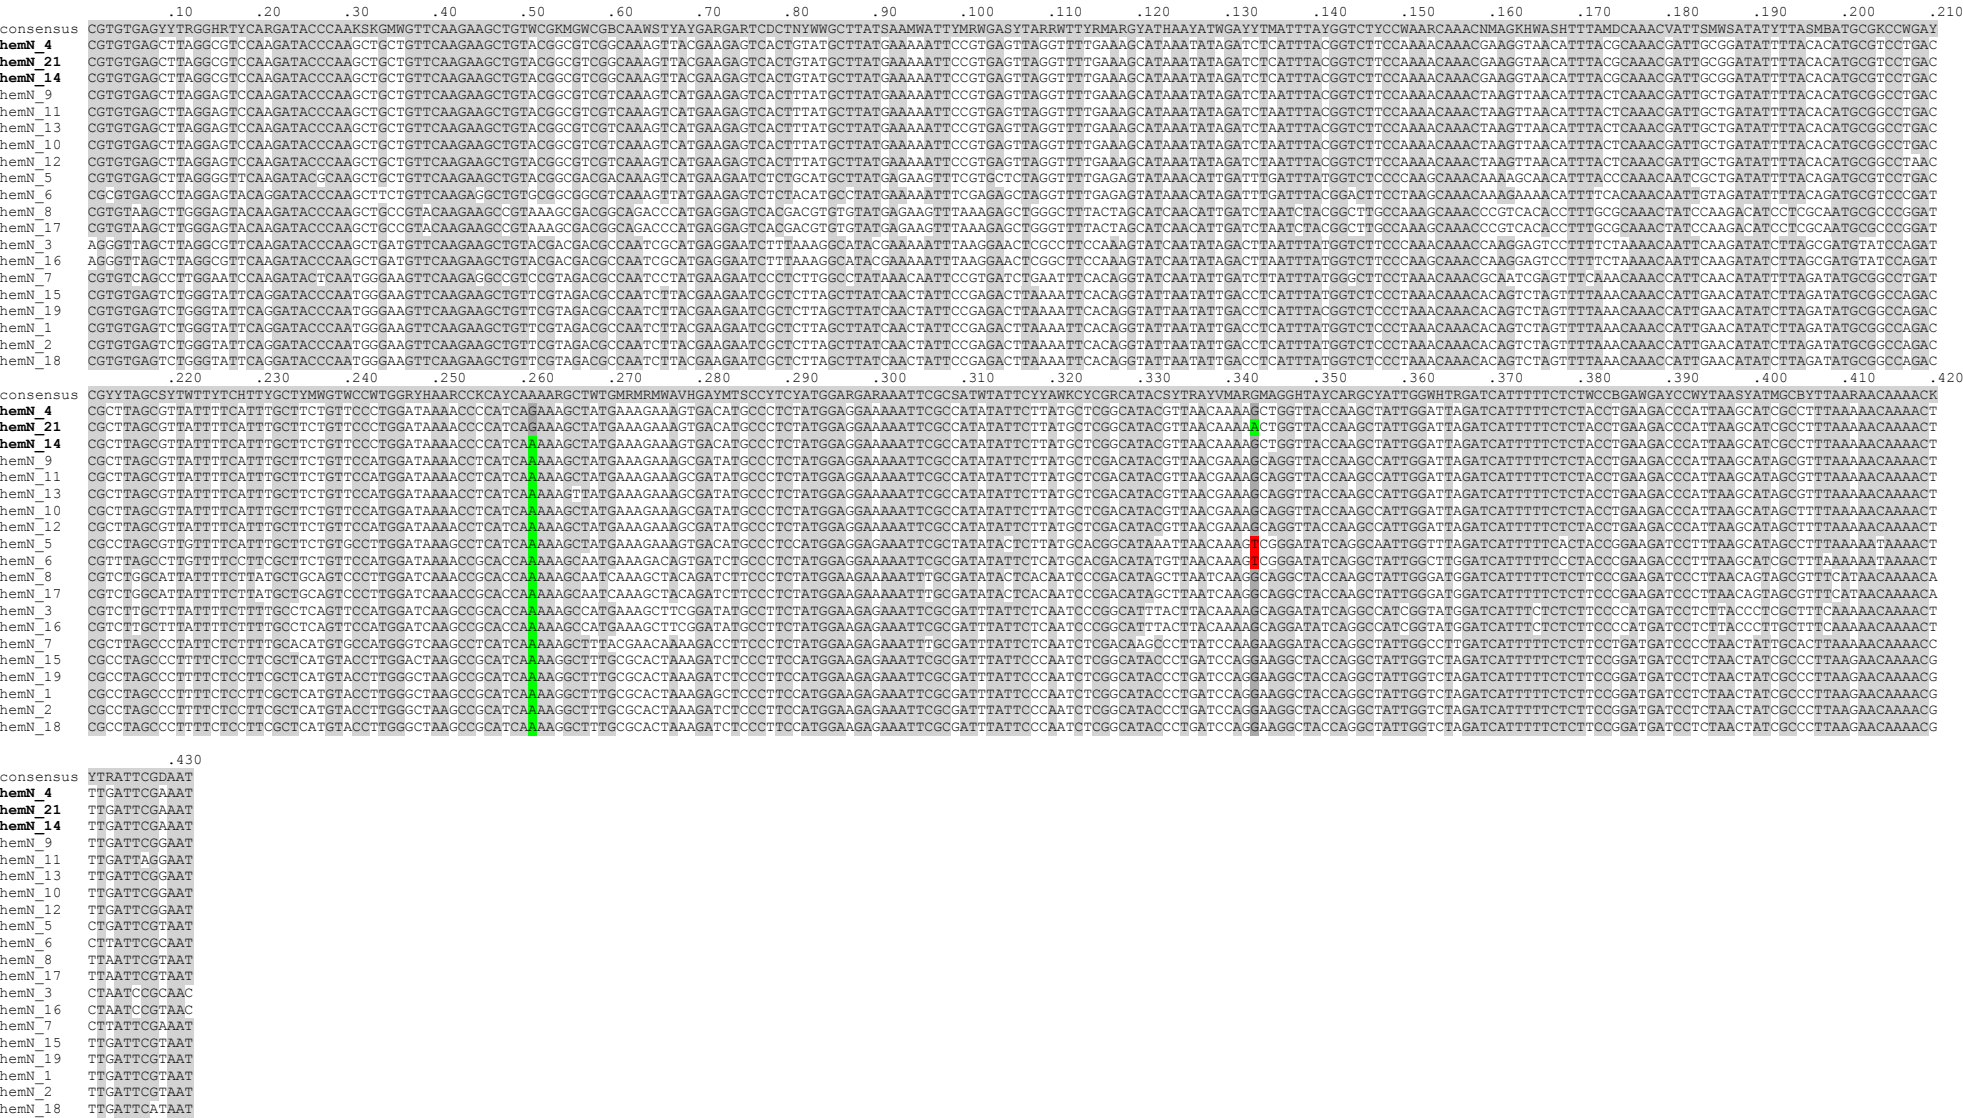

### A. Amino-acid substitutions among three *C. abortus* *hemN*-encoded protein alleles (b)

[illegible]

**B. Nucleotide substitutions among three *C. abortus gatA* alleles (in boldface; *gatA*\_5, *gatA*\_18, *gatA*\_13 ruminant and avian *C. abortus* alleles) (a)**

[illegible][illegible]





### C. Sequence alignment among *C. abortus fumC*-encoded protein alleles (b)

[illegible]



#### D. Amino-acid substitutions among *enoA*-encoded protein alleles (b)

[illegible]
